# Supplementary material for: Multi-decadal mass balance series of three Kyrgyz glaciers inferred from modelling constrained with repeated snow line observations
Source: Copernicus journal article supplement (doi:10.5194/tc-12-1899-2018), 2018-06-06
Supplement: Supplementary file 1 [file tc-12-1899-2018-supplement.zip]

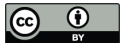

## *Supplement of*

# **Multi-decadal mass balance series of three Kyrgyz glaciers inferred from modelling constrained with repeated snow line observations**

**M. Barandun et al.**

*Correspondence to:* Martina Barandun (martina.barandun@unifr.ch)

- tc-12-1899-2018-supplement-title-page.pdf
- supplementary\_data
  - 1\_Abramov
    - \* SCAF\_observed.txt
    - \* model\_evaluation.txt
    - \* model\_results\_daily\_1993.txt
    - \* model\_results\_daily\_1994.txt
    - \* model\_results\_daily\_1998.txt
    - \* model\_results\_daily\_1999.txt
    - \* model\_results\_daily\_2000.txt
    - \* model\_results\_daily\_2001.txt
    - \* model\_results\_daily\_2002.txt
    - \* model\_results\_daily\_2003.txt
    - \* model\_results\_daily\_2004.txt
    - \* model\_results\_daily\_2005.txt
    - \* model\_results\_daily\_2006.txt
    - \* model\_results\_daily\_2007.txt
    - \* model\_results\_daily\_2008.txt
    - \* model\_results\_daily\_2009.txt
    - \* model\_results\_daily\_2010.txt
    - \* model\_results\_daily\_2011.txt
    - \* model\_results\_daily\_2012.txt
    - \* model\_results\_daily\_2013.txt
    - \* model\_results\_daily\_2014.txt
    - \* model\_results\_daily\_2015.txt
    - \* model\_results\_daily\_2016.txt
  - 2\_GlacierNo354

- \* SCAF\_observed.txt
- \* model\_evaluation.txt
- \* model\_results\_daily\_2004.txt
- \* model\_results\_daily\_2005.txt
- \* model\_results\_daily\_2006.txt
- \* model\_results\_daily\_2007.txt
- \* model\_results\_daily\_2008.txt
- \* model\_results\_daily\_2009.txt
- \* model\_results\_daily\_2010.txt
- \* model\_results\_daily\_2011.txt
- \* model\_results\_daily\_2012.txt
- \* model\_results\_daily\_2013.txt
- \* model\_results\_daily\_2014.txt
- \* model\_results\_daily\_2015.txt
- \* model\_results\_daily\_2016.txt
- 3\_Golubin
  - \* SCAF\_observed.txt
  - \* model\_evaluation.txt
  - \* model\_results\_daily\_2000.txt
  - \* model\_results\_daily\_2001.txt
  - \* model\_results\_daily\_2002.txt
  - \* model\_results\_daily\_2003.txt
  - \* model\_results\_daily\_2004.txt
  - \* model\_results\_daily\_2005.txt
  - \* model\_results\_daily\_2006.txt
  - \* model\_results\_daily\_2007.txt
  - \* model\_results\_daily\_2008.txt
  - \* model\_results\_daily\_2009.txt
  - \* model\_results\_daily\_2010.txt
  - \* model\_results\_daily\_2011.txt
  - \* model\_results\_daily\_2012.txt
  - \* model\_results\_daily\_2013.txt
  - \* model\_results\_daily\_2014.txt
  - \* model\_results\_daily\_2015.txt
  - \* model\_results\_daily\_2016.txt
- read\_me.txt

The copyright of individual parts of the supplement might differ from the CC BY 4.0 License.
